# Supplementary material
Source: ML conference proceedings conference paper supplement (https://openaccess.thecvf.com/content/CVPR2022/html/Xu_Revisiting_AP_Loss_CVPR_2022_paper.html)
Supplement: Supplementary file 1 [file Xu_Revisiting_AP_Loss_CVPR_2022_supplemental.pdf]

## -Appendix-

# Revisiting AP Loss for Dense Object Detection: Adaptive Ranking Pair Selection

### 1. Distant Function Selection

We evaluate the distant function with piece-wise step function  $\mathbf{H}(\cdot)$  and sigmoid function  $\mathbf{S}(\cdot)$ , as shown in Fig. 1 and Fig. 2 respectively. The experimental results based on RetinaNet [1] are given in Table 1. We can observe that the performance gap between piece-wise step function  $\mathbf{H}(\cdot)$  and sigmoid function  $\mathbf{S}(\cdot)$  is only 0.1% in term of AP (37.4 v.s. 37.3). The results demonstrate that these two distance functions have no essential difference. In this paper, we use  $\lambda = 8$  for all experiments.

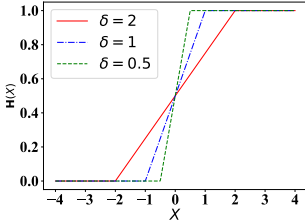

Figure 1.  $\mathbf{H}(\cdot)$ .

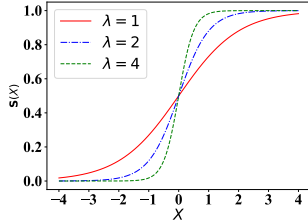

Figure 2.  $\mathbf{S}(\cdot)$ .

### 2. The Equivalence between Cross Entropy and Error-Driven Update

Here we find that if pair-wise error loss has the same gradients form as Eq.(7) in the main paper, then Error-Driven Update can be omitted for simplicity. To keep the numerator of pair-wise error gradients as the same as Eq.(7) in the main paper, we follow the common practice on cross entropy loss which adds a logistic function to sigmoid function. To start with,  $\mathbf{S}(\cdot)$  is replaced with  $\text{CE}(\mathbf{S}(\cdot), 0)/\lambda$ , which can be written as:

$$\begin{aligned} & \frac{1}{\lambda} \text{CE}(S(\hat{P}_v - \hat{P}_u), 0) \\ &= -\frac{1}{\lambda} ((1 - 0) \cdot \log(1 - S(\hat{P}_v - \hat{P}_u)) + 0 \cdot (S(\hat{P}_v - \hat{P}_u))) \\ &= -\frac{1}{\lambda} \log(1 - S(\hat{P}_v - \hat{P}_u)) \end{aligned} \quad (1)$$

where the gradients of this distance function w.r.t  $S(\hat{P}_v - \hat{P}_u)$  can be calculated as:

$$\frac{\partial \text{CE}(S(\hat{P}_v - \hat{P}_u), 0)}{\lambda \partial S(\hat{P}_v - \hat{P}_u)} = \frac{1}{\lambda(1 - S(\hat{P}_v - \hat{P}_u))} \quad (2)$$

Table 1. Varying delta and lambda for distance function.

| $\delta$ | AP   | AP <sub>50</sub> | AP <sub>75</sub> | $\lambda$ | AP   | AP <sub>50</sub> | AP <sub>75</sub> |
|----------|------|------------------|------------------|-----------|------|------------------|------------------|
| 1        | 37.0 | 57.6             | 39.2             | 2         | 36.4 | 57.1             | 37.9             |
| 0.5      | 37.4 | 57.5             | 39.2             | 4         | 36.9 | 57.5             | 38.7             |
| 0.25     | 36.8 | 56.3             | 38.7             | 8         | 37.3 | 57.4             | 38.9             |
| 0.125    | 35.1 | 53.8             | 36.6             | 16        | 36.5 | 55.9             | 38.3             |

Since the gradient of  $S(\hat{P}_v - \hat{P}_u)$  w.r.t  $\hat{P}_u$  can be written as:

$$\frac{\partial S(\hat{P}_v - \hat{P}_u)}{\partial \hat{P}_u} = -\lambda S(\hat{P}_v - \hat{P}_u)(1 - S(\hat{P}_v - \hat{P}_u)) \quad (3)$$

Therefore, we can have the the gradients of distance function w.r.t  $\hat{P}_u$ :

$$\begin{aligned} & \frac{\partial \text{CE}(S(\hat{P}_v - \hat{P}_u), 0)}{\lambda \partial \hat{P}_u} = \frac{\partial \text{CE}(S(\hat{P}_v - \hat{P}_u), 0)}{\lambda \partial S(\hat{P}_v - \hat{P}_u)} \cdot \frac{\partial S(\hat{P}_v - \hat{P}_u)}{\partial \hat{P}_u} \\ &= \frac{1}{\lambda(1 - S(\hat{P}_v - \hat{P}_u))} \cdot (-\lambda S(\hat{P}_v - \hat{P}_u)(1 - S(\hat{P}_v - \hat{P}_u))) \\ &= -S(\hat{P}_v - \hat{P}_u) \end{aligned} \quad (4)$$

Also, to keep the denominator term  $BC$  as the same as Eq. (7) in the main paper, we detach it from backpropagation and treat it as a constant. Note that, after employing these two tricks (*i.e.* cross entropy and detaching), we can have the same gradient of our pair-wise error (*i.e.*,  $(-\sum_{v \in \mathcal{N}} S(\hat{P}_v - \hat{P}_u)) / (\text{rank}^+(u) + \text{rank}^-(u))$ ) as AP loss, which theoretically leads to similar performances. The experimental results in Table 1 in the main paper also demonstrate that.

### 3. Threshold for Selecting Valid Negative Samples

In training processing, the number of negative samples  $N_{neg}$  is enormous and might overwhelm the loss. To solve this issue, we utilize a larger margin threshold  $T$  to filter out easy negative samples, as shown in Fig. 3. Specifically, we set a valid indicator for each pair-wise error to ignore easy pairs. Here we describe indicator function  $\mathbb{1}_{uv}$  as:

$$\mathbb{1}_{uv} = \begin{cases} 1, & \hat{P}_v - \hat{P}_u > T \\ 0, & \text{else} \end{cases} \quad (5)$$

Table 2. Varying  $th$  for  $N_{neg}$ .

| Balance Constant        | $T$  | AP   | AP <sub>50</sub> | AP <sub>75</sub> |
|-------------------------|------|------|------------------|------------------|
| $rank^+(u) + rank^-(u)$ | N/A  | 37.3 | 57.4             | 38.9             |
| $N_{neg}$               | 0    | 36.8 | 57.1             | 38.8             |
| $N_{neg}$               | 0.2  | 37.2 | 57.0             | 38.9             |
| $N_{neg}$               | 0.25 | 37.3 | 56.7             | 39.4             |
| $N_{neg}$               | 0.3  | 36.9 | 56.3             | 38.7             |
| $N_{neg}$               | 0.5  | 35.2 | 53.3             | 37.1             |

Table 3. Varying for  $Q$  on FCOS [2].

| $Q$     | AP   | AP <sub>50</sub> | AP <sub>75</sub> |
|---------|------|------------------|------------------|
| 10,000  | 37.6 | 54.3             | 40.0             |
| 50,000  | 39.7 | 57.3             | 42.3             |
| 100,000 | 40.0 | 58.1             | 42.4             |
| 200,000 | 40.0 | 58.1             | 42.6             |

Then  $N_{neg}$  is formulated as:  $N_{neg} = \sum_{v \in \mathcal{N}} \mathbb{1}_{uv}$ . We also study the impact of different thresholds on detection accuracy. As shown in Table 2, when  $T = 0.25$ ,  $N_{neg}$  provides the same performance as  $rank^+(u) + rank^-(u)$ . This demonstrates the selection of these two balance constants is robust.

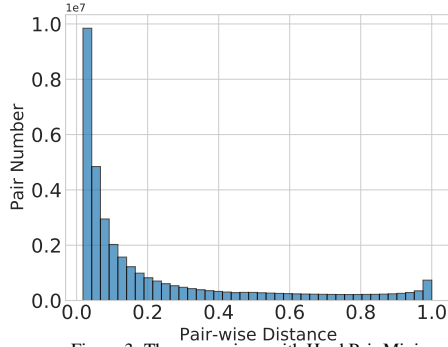

Figure 3. The comparison with Hard Pair Mining

#### 4. Maximum Pair Number

In our experiments, the memory (11GB) of 2080TI GPU can be ran out because of the extreme large number of pair  $\{\hat{P}_v, \hat{P}_u\}$ . Thus we adopt a simple yet efficient trick; constricting the input number of pairs.

Here we denote the maximum input number of pairs by  $Q$  (i.e. the maximum length of  $\mathcal{A}_u$  for  $L_{APE}$ ). Specifically, we manually choose the top  $Q$  predictions  $\hat{P}_v$  of negative samples in  $\mathcal{A}_u$ . We conduct experiments varying  $Q$  for APE loss on FCOS, and the results are shown in Table 3. When  $Q$  is greater than 100,000, the performance will no longer be improved. It can be concluded from the results that the promotion from large  $Q$  becomes minor as the gradually increasing of  $Q$ .

#### References

- [1] Tsung-Yi Lin, Piotr Dollár, Ross Girshick, Kaiming He, Bharath Hariharan, and Serge Belongie. Focal loss for dense

object detection. In *Proc. IEEE/CVF Int. Conf. Comput. Vis. (ICCV)*, pages 2117–2125, 2017. 1

- [2] Zhi Tian, Chunhua Shen, Hao Chen, and Tong He. FCOS: Fully convolutional one-stage object detection. In *Proc. IEEE/CVF Int. Conf. Comput. Vis. (ICCV)*, pages 9627–9636, 2019. 2
